# Supplementary material
Source: ML conference proceedings conference paper supplement (https://openreview.net/forum?id=rzMEuOUo5gq)

Student's t+Pareto ( $\eta = 0.2$ )

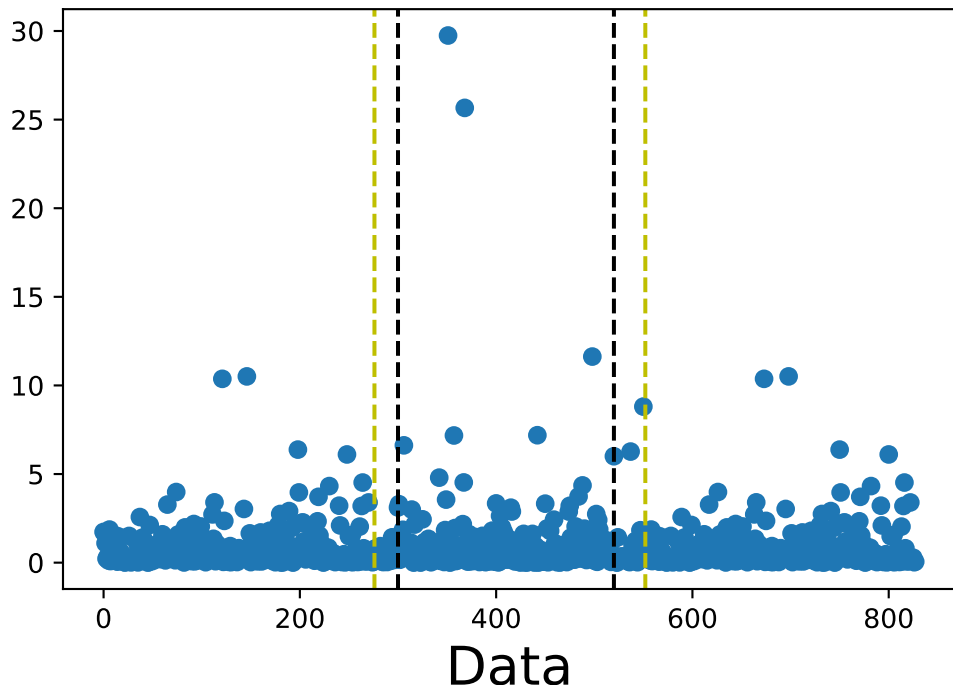

Supplement: supplementary_material [file attachment]

Normal + Power ( $\eta = 0.15$ )

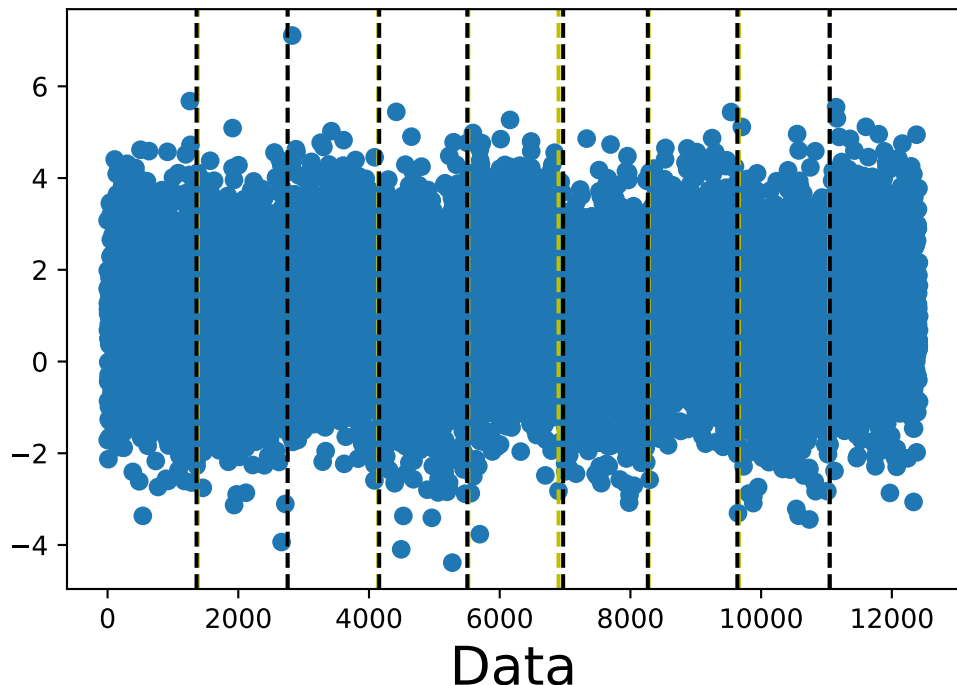

Supplement: supplementary_material [file attachment]

Student's t+Pareto ( $\eta = 0.25$ )

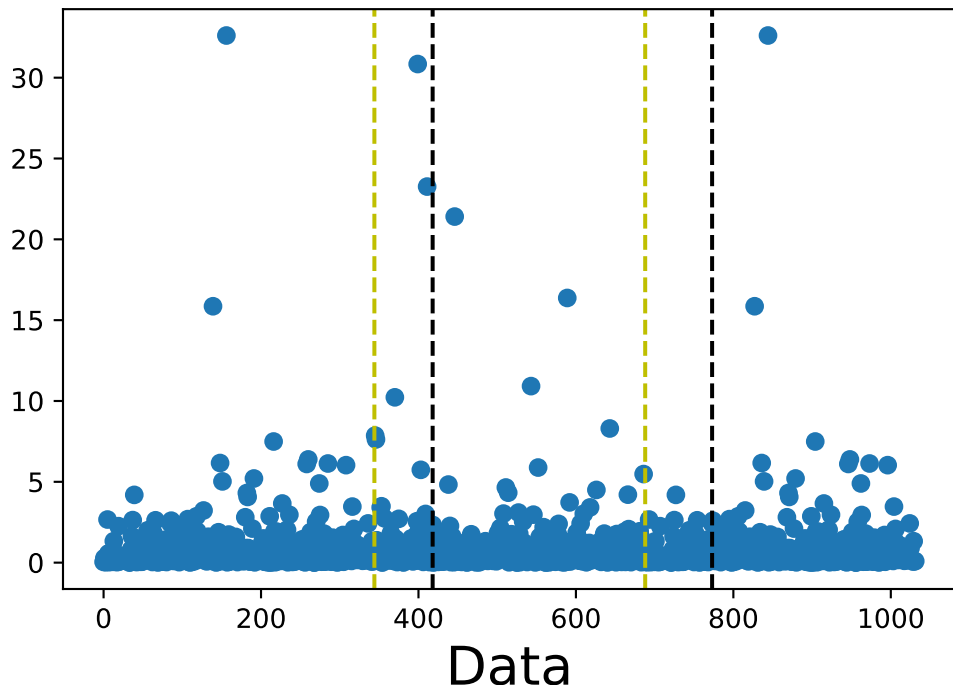

Supplement: supplementary_material [file attachment]

Student's t+Pareto ( $\eta = 0.1$ )

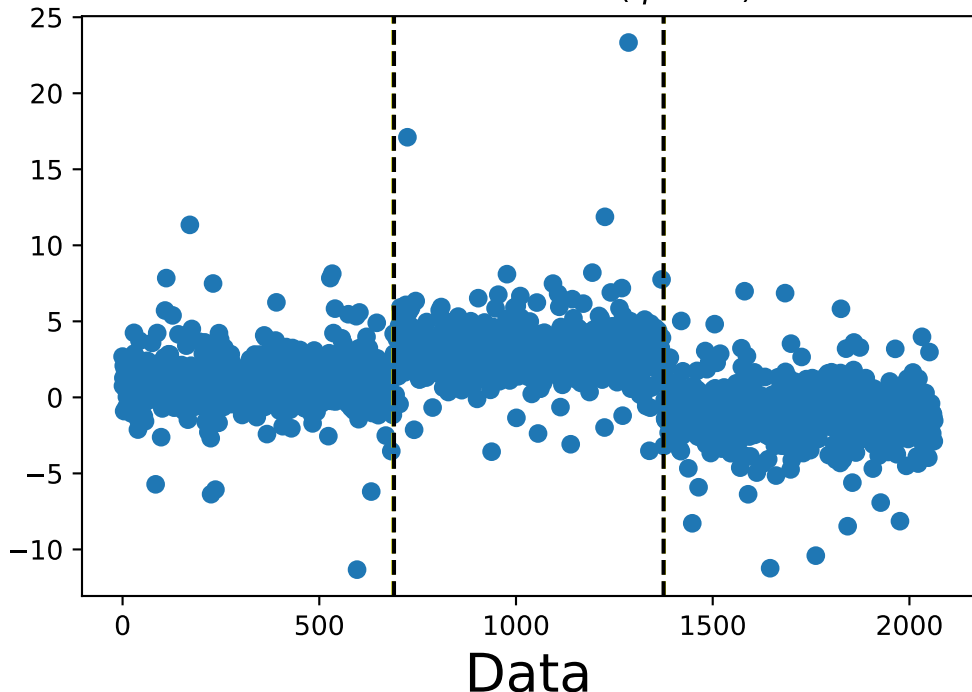

Supplement: supplementary_material [file attachment]

# PM2.5 Hong Kong

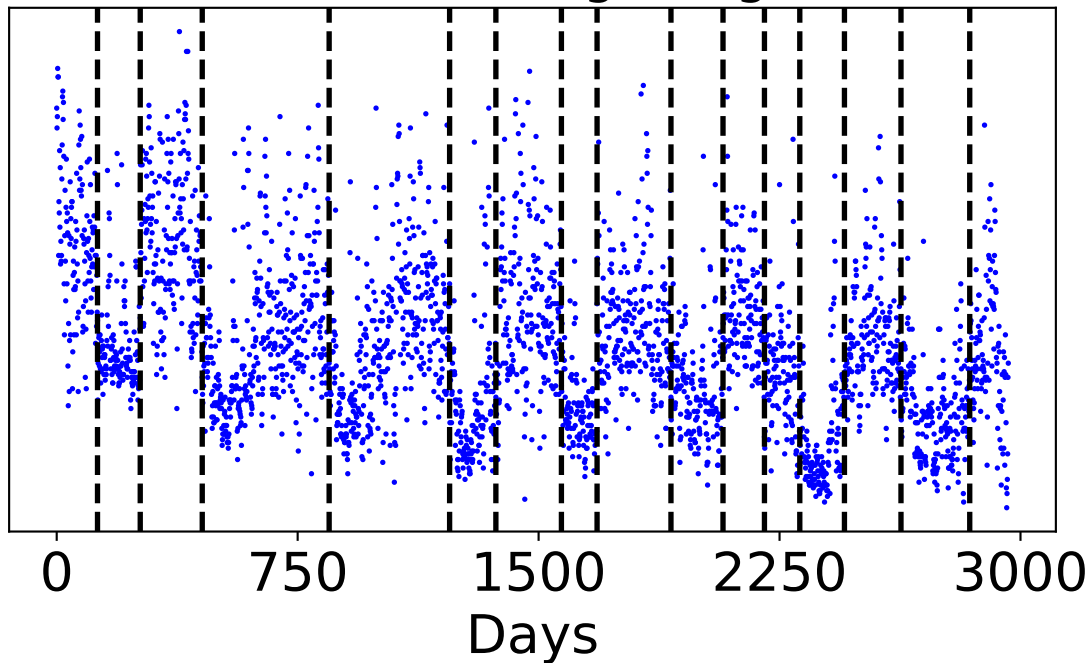

Supplement: supplementary_material [file attachment]

Student's t+Pareto ( $\eta = 0.15$ )

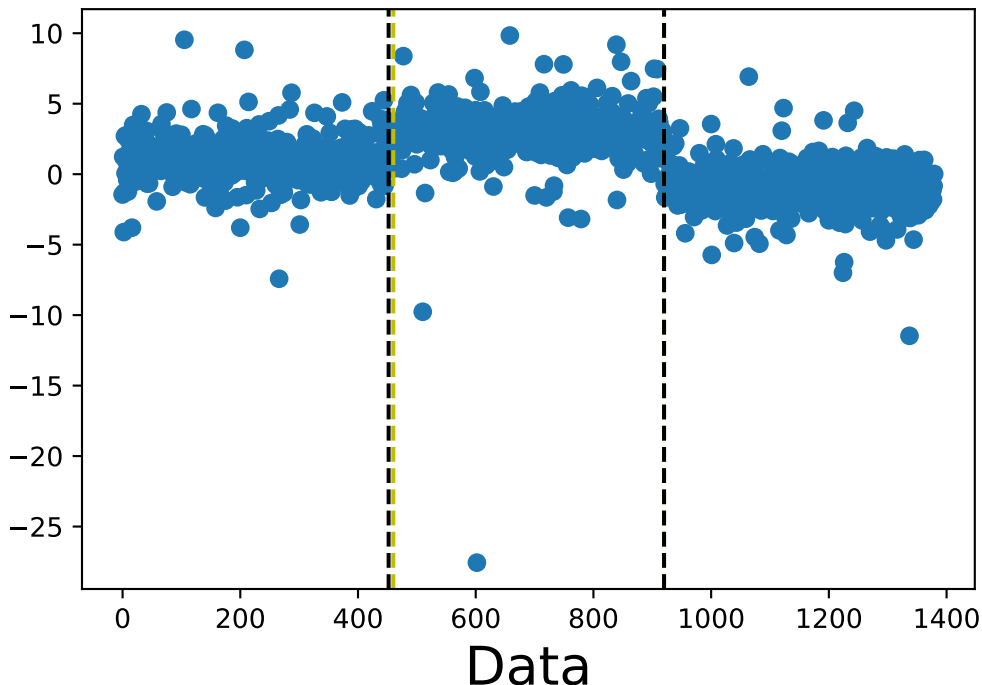

Supplement: supplementary_material [file attachment]

Student's t+Pareto ( $\eta = 0.15$ )

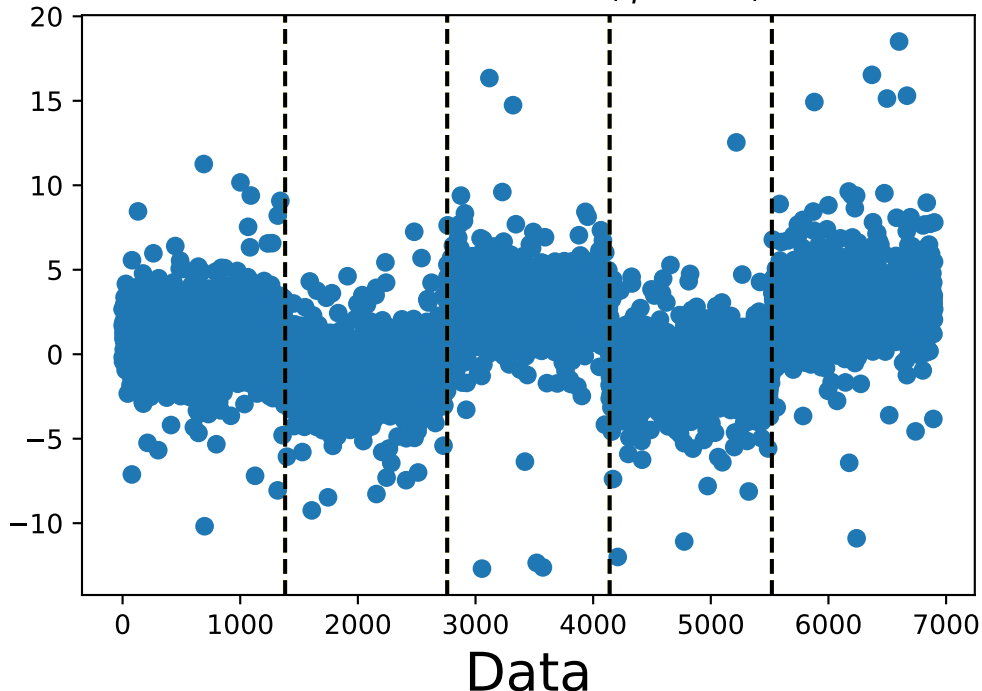

Supplement: supplementary_material [file attachment]

# Well-log data

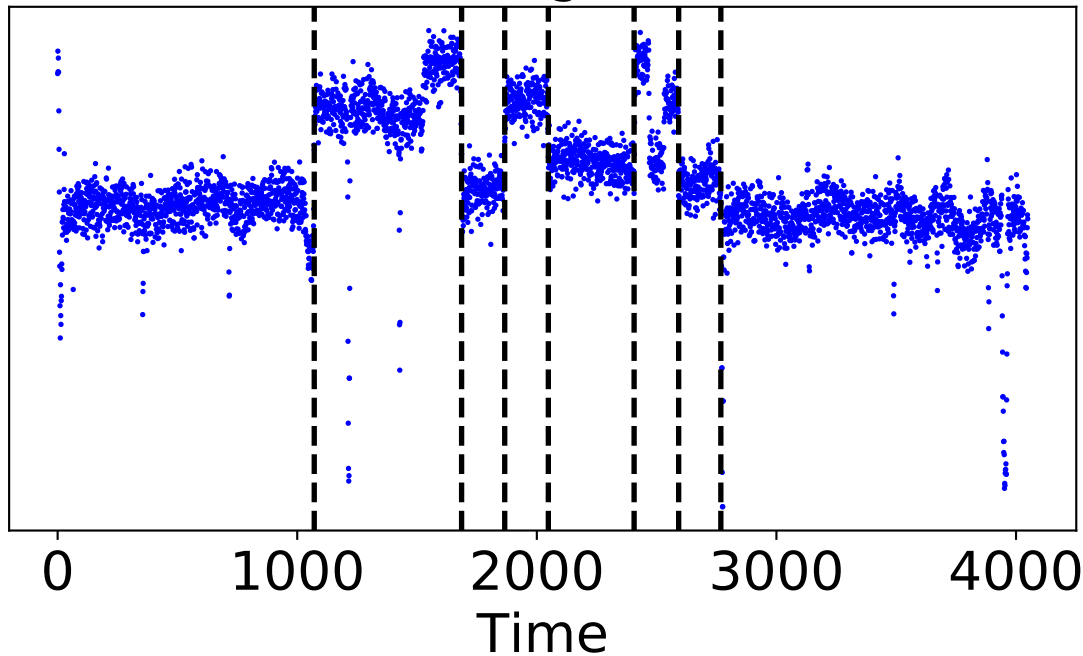

Supplement: supplementary_material [file attachment]
